# Supplementary material for: pVACtools: A Computational Toolkit to Identify and Visualize Cancer Neoantigens
Source: Oxford University Press journal article supplement (doi:10.1158/2326-6066.cir-19-0401), 2020-01-06
Supplement: 23266066cir190401-sup-223114_2_supp_5991679_q3c4hq.xlsx [file 23266066cir190401-sup-223114_2_supp_5991679_q3c4hq.xlsx]

## Sheet: Rajasagi et al
PubMed ID	Patient_ID	Gene_symbol	Mutant_peptide	Wildtype_peptide	AA_mutation	Chrom_pos	Validation_outcome	pVACtools predictions exist	Passed Binding Filter 500nM	Passed DNA Coverage Filter	Best Median Binding Score	Tumor DNA Depth	Tumor DNA VAF
PMID24891321	pt5002	ALMS1	TVPSSSFSHR	TVPSGSFSHR	p.G1002S	chr2:73676655	NO	Y	Y	Y	431.781	145	0.131
PMID24891321	pt5002	ALMS1	TPTVPSSSF	TPTVPSGSF	p.G1002S	chr2:73676655	YES	Y	Y	Y	56.783	145	0.131
PMID24891321	pt5002	ALMS1	SSSFSHREK	SGSFSHREK	p.G1002S	chr2:73676655	NO	Y	N	N	667.968	145	0.131
PMID24891321	pt5002	ALMS1	TVPSSSFSHR	TVPSGSFSHR	p.G1002S	chr2:73676655	NO	Y	Y	Y	341.395	145	0.131
PMID24891321	pt5002	C6orf89	MPIEPGDIGC	MPIEPGDIGY	p.Y318C	chr6:36891126	YES	Y	Y	Y	332.389	52	0.192
PMID24891321	pt5002	CDC25A	QSYCEPSSYR	QSYCEPPSYR	p.P484S	chr3:48200560	NO	Y	Y	Y	92.587	115	0.409
PMID24891321	pt5002	CDC25A	SYCEPSSYR	SYCEPPSYR	p.P484S	chr3:48200560	NO	Y	Y	Y	43.3	115	0.409
PMID24891321	pt5002	CDC25A	QSYCEPSSYR	QSYCEPPSYR	p.P484S	chr3:48200560	NO	Y	Y	Y	170.56	115	0.409
PMID24891321	pt5002	CDC25A	SYCEPSSYR	SYCEPPSYR	p.P484S	chr3:48200560	NO	Y	N	N	869.456	115	0.409
PMID24891321	pt5002	CDC25A	QSYCEPSSY	QSYCEPPSY	p.P484S	chr3:48200560	NO	Y	Y	Y	361.653	115	0.409
PMID24891321	pt5002	CRYBA1	WVCYQYSGYR	WVCYQYPGYR	p.P174S	chr17:27581239	NO	Y	Y	Y	227.718	337	0.516
PMID24891321	pt5002	CRYBA1	YQYSGYRGY	YQYPGYRGY	p.P174S	chr17:27581239	NO	Y	N	N	500.255	337	0.516
PMID24891321	pt5002	DSCAML1	SSIRSFVLQY	SSIRGFVLQY	p.G1475S	chr11:117309601	NO	Y	N	N	6742.4	55	0.273
PMID24891321	pt5002	HMGN2	NSAENGDAK	NPAENGDAK	p.P69S	chr1:26801126	NO	Y	N	N	695.26	34	0.176
PMID24891321	pt5002	POLR2A	VQKIFHINPR	AQKIFHINPR	p.A990V	chr17:7406744	NO	Y	N	N	1559.61	137	0.372
PMID24891321	pt5002	POLR2A	MIWNVQKIF	MIWNAQKIF	p.A990V	chr17:7406744	NO	Y	Y	Y	437.692	137	0.372
PMID24891321	pt5002	RALGAPB	WIMVLVLPK	WIMALVLPK	p.A96V	chr20:37121673	NO	Y	Y	N	213.875	269	0.071
PMID24891321	pt5002	RALGAPB	DWIMVLVLPK	DWIMALVLPK	p.A96V	chr20:37121673	NO	Y	N	N	1063.09	269	0.071
PMID24891321	pt5002	RALGAPB	DWIMVLVLPK	DWIMALVLPK	p.A96V	chr20:37121673	NO	Y	Y	N	351.704	269	0.071
PMID24891321	pt5002	STRAP	LISACKDGKR	LISACKDGKP	p.P41R	chr12:16036484	NO	Y	N	N	2131.19	173	0.15
PMID24891321	pt5002	STRAP	ISACKDGKR	ISACKDGKP	p.P41R	chr12:16036484	NO	Y	N	N	790.997	173	0.15
PMID24891321	pt5002	THNSL2	ATIESVQGAK	AAIESVQGAK	p.A149T	chr2:88474794	NO	Y	Y	Y	117.185	54	0.444
PMID24891321	pt5002	THNSL2	TIESVQGAK	AIESVQGAK	p.A149T	chr2:88474794	NO	Y	N	N	727.405	54	0.444
PMID24891321	pt5002	THOC6	ELWCRQPPYR	ELWRRQPPYR	p.R115C	chr16:3076270	NO	Y	Y	Y	43.294	24	0.583
PMID24891321	pt5002	THOC6	ELWCRQPPYR	ELWRRQPPYR	p.R115C	chr16:3076270	NO	Y	N	N	730.862	24	0.583
PMID24891321	pt5002	THOC6	ELWCRQPPY	ELWRRQPPY	p.R115C	chr16:3076270	NO	Y	N	N	655.985	24	0.583
PMID24891321	pt5002	THOC6	LWCRQPPYR	LWRRQPPYR	p.R115C	chr16:3076270	NO	Y	N	N	682.65	24	0.583
PMID24891321	pt5002	WHSC1L1	EVQASKHTK	EVQASEHTK	p.E184K	chr8:38205140	NO	Y	Y	Y	353.727	828	0.114
PMID24891321	pt5002	WHSC1L1	LLNEVQASK	LLNEVQASE	p.E184K	chr8:38205140	NO	Y	Y	Y	279.075	828	0.114
PMID24891321	pt5002	XPO1	KTVVNKLFK	KTVVNKLFE	p.E571K	chr2:61719472	NO	Y	N	N	750.73	125	0.152
